# Supplementary material for: A new mechanism of interferon’s antiviral action: Induction of autophagy, essential for paramyxovirus replication, is inhibited by the interferon stimulated gene, TDRD7
Source: PubMed Central journal article supplement (PMC5806901; doi:10.1371/journal.ppat.1006877), 2018-01-30
Supplement: ppat.1006877.s008.pdf [file ppat.1006877.s008.pdf]

| <b>ISGs</b> | <b>z-score</b> |
|-------------|----------------|
| GPR126      | 3.631111111    |
| IL13RA1     | 3.386479592    |
| ADAR        | 3.278290598    |
| KBTBD8      | 3.263589744    |
| ZNFX1       | 3.06075        |
| RGS22       | 2.925918367    |
| SC4MOL      | 2.849          |
| IL8         | 2.82975        |
| NMI         | 2.826581633    |
| UGT1A1      | 2.695          |
| TRIM69      | 2.631452991    |
| EMR1        | 2.602051282    |
| CASP1       | 2.484444444    |
| LAMP3       | 2.474387755    |
| EIF2AK2     | 2.337435897    |
| NAMPT       | 2.308034188    |
| IL4I1       | 2.249230769    |
| DDX58       | 2.19042735     |
| ATL1        | 2.102222222    |
| GBP5        | 2.0405         |
| NPIP        | 2.0405         |
| TDRD7       | 2.016944444    |
| PAK3        | 2.014017094    |
| GPR126      | 1.940512821    |
| PNPT1       | 1.90575        |
| DHX58       | 1.86725        |
| PPM1K       | 1.864722222    |
| SERPINB7    | 1.85127551     |
| TNFSF10     | 1.819055556    |
| IL8         | 1.79025        |
| AGXT        | 1.75175        |
| IL18        | 1.71325        |
| ACSL4       | 1.652602041    |
| AURKB       | 1.636388889    |
| PAK3        | 1.631794872    |
| DDX3X       | 1.59775        |
| SCGB2A1     | 1.491777778    |
| PPP2R2A     | 1.48225        |
| CTSS        | 1.47008547     |
| ASCC3       | 1.463          |
| CXCR4       | 1.455384615    |
| CHAC1       | 1.435867347    |
| WDFY1       | 1.430888889    |
| KRT1        | 1.4245         |
| TLR3        | 1.40877551     |
| RPL41       | 1.408055556    |
| SYNJ1       | 1.36675        |
| SP110       | 1.323076923    |

|          |             |
|----------|-------------|
| UBD      | 1.323076923 |
| IFIH1    | 1.293888889 |
| Pmp22    | 1.293675214 |
| IFIT3    | 1.265       |
| DDX58    | 1.255255102 |
| AcsL4    | 1.237193878 |
| USP18    | 1.234871795 |
| STAT1    | 1.226851852 |
| TRIM34   | 1.205470085 |
| FAM106A  | 1.201071429 |
| CXCL1    | 1.1935      |
| CCNG1    | 1.19        |
| LMO2     | 1.155       |
| OAS1     | 1.149277778 |
| CD38     | 1.138518519 |
| C2orf30  | 1.13        |
| MOV10    | 1.058461538 |
| UBE2L6   | 1.043760684 |
| APOL1    | 1.025       |
| APOD     | 1.011428571 |
| SP100    | 1.004666667 |
| NT5C3    | 0.984375    |
| PPM1K    | 0.98175     |
| PNPT1    | 0.98        |
| STAT2    | 0.966611111 |
| IFIT2    | 0.945       |
| TNFSF13B | 0.921484375 |
| ANKS1B   | 0.915       |
| CXCR4    | 0.911452991 |
| USP18    | 0.904928571 |
| TAP2     | 0.90475     |
| IL13RA1  | 0.8905      |
| HTR1D    | 0.8855      |
| CD47     | 0.846357143 |
| TOR3A    | 0.822       |
| MOV10    | 0.821307506 |
| ICAM1    | 0.812755102 |
| ADAR     | 0.808547009 |
| TNFSF13B | 0.8085      |
| GBP3     | 0.791555556 |
| GBP5     | 0.776632653 |
| TRIM6    | 0.77537037  |
| OGFR     | 0.755740741 |
| IRF9     | 0.755       |
| IFIH1    | 0.75075     |
| GLI3     | 0.75075     |
| ZEB2     | 0.75        |
| TRIM34   | 0.744309927 |
| SLC15A3  | 0.744309927 |

|           |             |
|-----------|-------------|
| HLA-DQA1  | 0.74375     |
| IFNGR1    | 0.74        |
| TNFAIP6   | 0.7315      |
| OAS2      | 0.729214286 |
| NPC2      | 0.716481481 |
| TAP2      | 0.71225     |
| TRIM21    | 0.705811138 |
| TRIM34    | 0.690940171 |
| EIF2AK2   | 0.685       |
| LGALS3BP  | 0.680145278 |
| KRT1      | 0.678125    |
| LOC339047 | 0.677295918 |
| TMOD3     | 0.677295918 |
| ICAM3     | 0.677222222 |
| CXCL10    | 0.661538462 |
| SYNJ1     | 0.655       |
| TNFSF10   | 0.6545      |
| B2M       | 0.648046875 |
| IRF9      | 0.647214286 |
| PARP12    | 0.647214286 |
| LAP3      | 0.645       |
| ADAR      | 0.632136752 |
| UBD       | 0.628148148 |
| IL18      | 0.615       |
| NP        | 0.6125      |
| SP110     | 0.586055556 |
| SC4MOL    | 0.578444444 |
| GTPBP2    | 0.577959184 |
| NPM3      | 0.57748184  |
| HTR1D     | 0.575       |
| TTC39B    | 0.569259259 |
| IFITM2    | 0.563222222 |
| FCGR1A    | 0.559444444 |
| SAMD9     | 0.541785714 |
| ZC3HAV1   | 0.54        |
| MOV10     | 0.538983051 |
| CCNG1     | 0.533203125 |
| JAK2      | 0.527734375 |
| TRIM34    | 0.526150121 |
| PSME2     | 0.52377551  |
| SP100     | 0.516796875 |
| DDX58     | 0.514529915 |
| GPR126    | 0.513317191 |
| FAM106A   | 0.5125      |
| IFIT2     | 0.51        |
| C2orf30   | 0.505       |
| STAT2     | 0.495       |
| SEMA6D    | 0.48671875  |
| ATF3      | 0.486142857 |

|           |             |
|-----------|-------------|
| CCL4      | 0.486142857 |
| STAT3     | 0.485128205 |
| LGALS3BP  | 0.485128205 |
| TTC39B    | 0.485       |
| UBE2L6    | 0.480925926 |
| RGS22     | 0.4795      |
| REEP3     | 0.473046875 |
| STAT3     | 0.47042735  |
| DDX3X     | 0.47042735  |
| ZNF148    | 0.468571429 |
| MAP3K8    | 0.465       |
| CTTNBP2NL | 0.459785714 |
| TRIM69    | 0.455726496 |
| IFI16     | 0.451171875 |
| STAT1     | 0.45        |
| IL18      | 0.448071429 |
| MX2       | 0.440234375 |
| APOD      | 0.44        |
| CD38      | 0.435       |
| SP110     | 0.427571429 |
| PAK3      | 0.423828125 |
| DOCK4     | 0.4235      |
| C2orf64   | 0.423486683 |
| SOCS1     | 0.422037037 |
| JAK2      | 0.418611111 |
| C2, CFB   | 0.412222222 |
| BST2      | 0.407421875 |
| FCGR1A    | 0.406377551 |
| GBP3      | 0.404142857 |
| LPGAT1    | 0.397346939 |
| AKT3      | 0.395       |
| SNX5      | 0.392592593 |
| STAT3     | 0.384987893 |
| FAM3C     | 0.382222222 |
| NAMPT     | 0.380714286 |
| TAP2      | 0.379285714 |
| FKBP1B    | 0.379285714 |
| AIDA      | 0.375       |
| CXCL11    | 0.372944444 |
| REC8      | 0.363671875 |
| TNFSF13B  | 0.360214286 |
| IFI44L    | 0.357722222 |
| GMPR      | 0.351428571 |
| SPTBN4    | 0.343163265 |
| INDO      | 0.333857143 |
| PLSCR1    | 0.328       |
| AIDA      | 0.327277778 |
| REEP3     | 0.323888889 |
| ADAR      | 0.323418803 |

|           |             |
|-----------|-------------|
| PLSCR1    | 0.322142857 |
| CXCR4     | 0.320823245 |
| AKAP8     | 0.320823245 |
| MOV10     | 0.316285714 |
| PML       | 0.316071429 |
| NAMPT     | 0.31171875  |
| C2orf30   | 0.31        |
| AKAP8     | 0.308717949 |
| RARRES3   | 0.296833333 |
| SERPING1  | 0.295785714 |
| NMI       | 0.294444444 |
| CD38      | 0.278214286 |
| CASP1     | 0.275       |
| ATL3      | 0.272357143 |
| IFRD1     | 0.270918367 |
| NT5C3     | 0.269428571 |
| PKLR      | 0.261887755 |
| LPGAT1    | 0.260642857 |
| C19orf66  | 0.257714286 |
| PML       | 0.256658596 |
| ATL1      | 0.254785714 |
| ACSL4     | 0.251857143 |
| DDX3X     | 0.25025     |
| CD47      | 0.245       |
| HTR1D     | 0.243825666 |
| HERC6     | 0.235944444 |
| LGALS3BP  | 0.234795918 |
| PAK3      | 0.230992736 |
| EIF2AK2   | 0.222571429 |
| GNB4      | 0.219642857 |
| PMP22     | 0.216015625 |
| C2orf30   | 0.215925926 |
| BTC       | 0.21175     |
| EXOC4     | 0.197888889 |
| CXCL10    | 0.195       |
| EMR1      | 0.193285714 |
| EXOC4     | 0.193285714 |
| EMR1      | 0.192493947 |
| LOC727996 | 0.192493947 |
| C2orf64   | 0.192493947 |
| MAP3K8    | 0.187428571 |
| TXNDC17   | 0.178642857 |
| IFIT5     | 0.176666667 |
| KLK8      | 0.175055556 |
| SEC14L3   | 0.169857143 |
| TMOD3     | 0.166928571 |
| HMG1L6    | 0.165       |
| NFS1      | 0.165       |
| IRF1      | 0.164       |

|           |             |
|-----------|-------------|
| PSME2     | 0.16255102  |
| LGALS9    | 0.161071429 |
| OSBPL9    | 0.161071429 |
| TRIM22    | 0.159833333 |
| LOC727996 | 0.153995157 |
| HMG1L6    | 0.152222222 |
| CXCL1     | 0.147222222 |
| DDX3X     | 0.137407407 |
| DTX3L     | 0.13475     |
| TRIM34    | 0.128329298 |
| OAS2      | 0.125928571 |
| TCIRG1    | 0.125       |
| HRASLS2   | 0.12        |
| SAMHD1    | 0.12        |
| GPR126    | 0.117606838 |
| REC8      | 0.1155      |
| TRIM6     | 0.115496368 |
| TRIM34    | 0.115496368 |
| SLC1A3    | 0.115496368 |
| GNB4      | 0.107962963 |
| DDX3Y     | 0.107962963 |
| MOV10     | 0.102905983 |
| BIRC3     | 0.1         |
| IFI6      | 0.099571429 |
| EPC1      | 0.098944444 |
| HLA-B     | 0.098944444 |
| ACSL4     | 0.09        |
| SOCS1     | 0.08203125  |
| XAF1      | 0.082       |
| GNB4      | 0.08127551  |
| AIDA      | 0.08        |
| IFNGR1    | 0.078518519 |
| DEFA1     | 0.07        |
| CCNG1     | 0.068703704 |
| SCGB2A1   | 0.068359375 |
| LAMP3     | 0.067357143 |
| CCNG1     | 0.065625    |
| NPM3      | 0.064164649 |
| AKAP8     | 0.062890625 |
| TRIM34    | 0.058803419 |
| IFI6      | 0.05775     |
| SERPING1  | 0.05775     |
| EIF2AK2   | 0.051953125 |
| AKAP8     | 0.051331719 |
| GMPR      | 0.049074074 |
| GBP3      | 0.046857143 |
| RNASE6    | 0.045666667 |
| TRIM34    | 0.039259259 |
| SERPINB7  | 0.03828125  |

|              |             |
|--------------|-------------|
| NUB1         | 0.036122449 |
| PSMB9        | 0.030078125 |
| DEFA1        | 0.02734375  |
| UBE2L6       | 0.02734375  |
| AURKB        | 0.026357143 |
| SERPINB7     | 0.026357143 |
| IFI44L       | 0.021875    |
| TRIM69       | 0.0205      |
| IL8          | 0.01962963  |
| SEC14L3      | 0.01962963  |
| RSAD2        | 0.017571429 |
| FKBP1B       | 0.01640625  |
| HRASLS2      | 0.015222222 |
| EMR1         | 0.015       |
| SLC15A3      | 0.01283293  |
| SP100        | 0.0109375   |
| OSBPL9       | 0.008785714 |
| MSMB         | 0.008785714 |
| GBP2         | 0.007611111 |
| B2M          | 0           |
| PPP2R2A      | 0           |
| SLC45A2      | 0           |
| ANKFY1       | 0           |
| DOCK4        | 0           |
| GBP4         | 0           |
| EIF2AK2      | 0           |
| NMI          | 0           |
| DTX3L        | 0           |
| HSD17B14     | 0           |
| APOL1        | 0           |
| UBA7         | 0           |
| HERC5        | 0           |
| MX1          | 0           |
| ATL3         | 0           |
| GPR177       | 0           |
| C2orf30      | 0           |
| FAM46A       | 0           |
| ACSL4        | 0           |
| HERC5        | 0           |
| IL6          | 0           |
| RGS22        | 0           |
| LOC100132540 | 0           |
| SLAMF7       | 0           |
| SAMD9        | 0           |
| DDX58        | 0           |
| DDX58        | 0           |
| HIST2H2BE    | 0           |
| ADAR         | 0           |
| TRIM14       | 0           |

|              |   |
|--------------|---|
| HSD17B14     | 0 |
| OASL         | 0 |
| B2M          | 0 |
| SLC16A4      | 0 |
| GTPBP2       | 0 |
| NAMPT        | 0 |
| IRF8         | 0 |
| GBP5         | 0 |
| SAMHD1       | 0 |
| MAP3K8       | 0 |
| SYNJ1        | 0 |
| ZNF384       | 0 |
| CYP26A1      | 0 |
| IL8          | 0 |
| LYPLA1       | 0 |
| LOC100132540 | 0 |
| GNB4         | 0 |
| OSBPL9       | 0 |
| PARP12       | 0 |
| TRIM22       | 0 |
| HLA-F        | 0 |
| IRF1         | 0 |
| DHX58        | 0 |
| PLSCR2       | 0 |
| KBTBD8       | 0 |
| IFITM1       | 0 |
| AKT3         | 0 |
| ISG15        | 0 |
| IFRG15       | 0 |
| LSS          | 0 |
| HERC6        | 0 |
| GBP1         | 0 |
| NFS1         | 0 |
| SEC14L2      | 0 |
| STAT3        | 0 |
| SLC25A28     | 0 |
| NMI          | 0 |
| VISA         | 0 |
| SLC16A4      | 0 |
| CCNG1        | 0 |
| PARP9        | 0 |
| HERC5        | 0 |
| IFRD1        | 0 |
| SLC25A28     | 0 |
| GCH1         | 0 |
| PARP14       | 0 |
| ICAM1        | 0 |
| IFIH1        | 0 |
| ASCC3        | 0 |



|          |              |
|----------|--------------|
| NP       | 0            |
| SAMD9L   | 0            |
| IFI44    | 0            |
| GPR177   | 0            |
| FAM3C    | 0            |
| ASCC3    | 0            |
| CCNG1    | 0            |
| PLSCR1   | 0            |
| EIF2AK2  | 0            |
| UBD      | 0            |
| DDX3X    | 0            |
| ICAM1    | 0            |
| SAMD9L   | 0            |
| MOV10    | 0            |
| PAK3     | 0            |
| MOV10    | 0            |
| MOV10    | 0            |
| LGALS3BP | 0            |
| TRIM21   | 0            |
| EMR1     | 0            |
| MOV10    | 0            |
| TRIM21   | 0            |
| IL4I1    | 0            |
| GPR126   | 0            |
| CXCR4    | 0            |
| HTR1D    | 0            |
| ADAR     | 0            |
| MX1      | -0.002734375 |
| IFITM1   | -0.002734375 |
| GLI3     | -0.005       |
| ATCAY    | -0.008785714 |
| RGS22    | -0.009030612 |
| TRIM14   | -0.011714286 |
| TRIM6    | -0.013671875 |
| AKT3     | -0.015222222 |
| IRF3     | -0.017571429 |
| ANKS1B   | -0.018061224 |
| CXCR4    | -0.01962963  |
| WDFY1    | -0.01962963  |
| ISG20    | -0.02        |
| WDFY1    | -0.02        |
| SLC45A2  | -0.021875    |
| ZC3HAV1  | -0.027091837 |
| LPGAT1   | -0.027091837 |
| GBP1     | -0.029444444 |
| BIRC3    | -0.030444444 |
| ANKS1B   | -0.035       |
| PARP9    | -0.036122449 |
| CCDC50   | -0.041015625 |

|              |              |
|--------------|--------------|
| C1S          | -0.04375     |
| LOC339047    | -0.045       |
| LOC100132540 | -0.045       |
| LMO2         | -0.045153061 |
| ATL1         | -0.046857143 |
| CASP1        | -0.049074074 |
| IFNGR1       | -0.054183673 |
| NLRC5        | -0.055642857 |
| DDX24        | -0.05775     |
| SERPINB7     | -0.060888889 |
| KRT1         | -0.0615      |
| TRIM34       | -0.064164649 |
| IL6          | -0.065       |
| UBA7         | -0.065       |
| LMO2         | -0.068703704 |
| SAMHD1       | -0.072244898 |
| GPR126       | -0.073504274 |
| IL4I1        | -0.073504274 |
| AIDA         | -0.073828125 |
| RNASE6       | -0.076111111 |
| TRIM34       | -0.077       |
| TRIM25       | -0.079296875 |
| ASCC3        | -0.090234375 |
| RTP4         | -0.090785714 |
| GBP2         | -0.090785714 |
| CEACAM1      | -0.096642857 |
| LY6E         | -0.098148148 |
| PPM1K        | -0.098148148 |
| LGALS9       | -0.098148148 |
| SEMA6D       | -0.098148148 |
| ZNF148       | -0.0984375   |
| SC4MOL       | -0.099336735 |
| SLC1A3       | -0.102663438 |
| NFS1         | -0.105428571 |
| LPGAT1       | -0.106640625 |
| APOL6        | -0.107962963 |
| LSS          | -0.108367347 |
| SCGB2A1      | -0.108367347 |
| DOCK4        | -0.11        |
| HLA-DQA1     | -0.111285714 |
| ZNF384       | -0.115       |
| AGT          | -0.117578125 |
| KBTBD8       | -0.117606838 |
| MYO1C        | -0.121777778 |
| REC8         | -0.128515625 |
| IFI35        | -0.128857143 |
| GTPBP2       | -0.128857143 |
| ATL3         | -0.13        |
| EMR1         | -0.132307692 |

|              |              |
|--------------|--------------|
| TLR3         | -0.133984375 |
| DDX24        | -0.13475     |
| UGT1A1       | -0.135       |
| SOCS1        | -0.135459184 |
| IFRD1        | -0.13671875  |
| CXCR4        | -0.137642857 |
| NAMPT        | -0.1421875   |
| CA13         | -0.1435      |
| VISA         | -0.144921875 |
| IL1RN        | -0.158142857 |
| GMPR         | -0.161328125 |
| IFI27        | -0.161328125 |
| XDH          | -0.16255102  |
| PARP9        | -0.16255102  |
| IFRG15       | -0.164       |
| KLK10        | -0.1640625   |
| SLC16A4      | -0.166851852 |
| IL1RN        | -0.166851852 |
| C19orf66     | -0.167444444 |
| LOC100131940 | -0.167444444 |
| DDX24        | -0.167444444 |
| BATF2        | -0.175055556 |
| ANP32B       | -0.18046875  |
| IFIT3        | -0.18046875  |
| AKT3         | -0.180612245 |
| DTX3L        | -0.182666667 |
| CA13         | -0.1845      |
| PMP22        | -0.1859375   |
| SERPINB7     | -0.186481481 |
| KRT1         | -0.186481481 |
| IL18         | -0.189642857 |
| PSME2        | -0.189642857 |
| AKT3         | -0.190357143 |
| EMR1         | -0.191111111 |
| HTR1D        | -0.191111111 |
| DTX3L        | -0.19140625  |
| GOSR1        | -0.199609375 |
| C19orf66     | -0.2055      |
| LPGAT1       | -0.205811966 |
| TRIM69       | -0.205811966 |
| MAFK         | -0.207704082 |
| FCGR1A       | -0.216734694 |
| PLSCR1       | -0.2296875   |
| TRIM6        | -0.235       |
| LOC727996    | -0.235213675 |
| AKAP8        | -0.235213675 |
| PLSCR2       | -0.243555556 |
| GBP4         | -0.243555556 |
| C2orf64      | -0.243825666 |

|           |              |
|-----------|--------------|
| CCL4      | -0.243826531 |
| EIF2AK2   | -0.248828125 |
| PPP2R2A   | -0.25025     |
| AIM1      | -0.2515625   |
| SLC25A28  | -0.252857143 |
| NLRC5     | -0.254296875 |
| NPM3      | -0.256658596 |
| MAFK      | -0.258777778 |
| AGT       | -0.259765625 |
| SP140     | -0.26        |
| FAM46A    | -0.261887755 |
| ATCAY     | -0.261887755 |
| CTTNBP2NL | -0.266388889 |
| APOL1     | -0.26796875  |
| PLA1A     | -0.26796875  |
| IL4I1     | -0.270918367 |
| FAM3C     | -0.272357143 |
| EIF2AK2   | -0.274       |
| CTSS      | -0.276171875 |
| TRIM6     | -0.27890625  |
| TMOD3     | -0.281611111 |
| TGM2      | -0.281611111 |
| TMEM146   | -0.281640625 |
| CTTNBP2NL | -0.28462963  |
| OAS1      | -0.287109375 |
| TRIM21    | -0.28875     |
| KLK8      | -0.289222222 |
| B2M       | -0.295       |
| ZC3HAV1   | -0.295785714 |
| CCDC50    | -0.296833333 |
| MAFK      | -0.296833333 |
| PARP9     | -0.30625     |
| LGALS9    | -0.307040816 |
| RSAD2     | -0.308984375 |
| IRF1      | -0.308984375 |
| MYD88     | -0.31        |
| KRT1      | -0.312055556 |
| PLA1A     | -0.312055556 |
| DAXX      | -0.312055556 |
| CCL5      | -0.312265625 |
| TRIM6     | -0.312539063 |
| NPC2      | -0.313357143 |
| NFIL3     | -0.314074074 |
| CXCL1     | -0.314074074 |
| INDO      | -0.314074074 |
| SP140     | -0.314074074 |
| LAMP3     | -0.316071429 |
| FTL       | -0.316285714 |
| SLC45A2   | -0.316285714 |

|           |              |
|-----------|--------------|
| CDKN1A    | -0.319648438 |
| ATCAY     | -0.325       |
| TNFSF13B  | -0.325102041 |
| IFIT5     | -0.325755556 |
| APOL6     | -0.331844444 |
| IRF9      | -0.333867188 |
| TAPBP     | -0.334132653 |
| GCH1      | -0.334132653 |
| BLMH      | -0.3390625   |
| HLA-A     | -0.339609375 |
| STAT1     | -0.339714286 |
| WDFY1     | -0.343163265 |
| GBP2      | -0.345       |
| LOC23117  | -0.3485      |
| TRIM22    | -0.353333333 |
| CHAC1     | -0.353333333 |
| HCP5      | -0.359023438 |
| SLC15A3   | -0.359322034 |
| CXCL11    | -0.360005556 |
| IFITM2    | -0.36122449  |
| ATF3      | -0.36122449  |
| AURKB     | -0.361757813 |
| ZNFX1     | -0.370255102 |
| SEC14L2   | -0.37515625  |
| EIF2AK2   | -0.387405556 |
| ATL3      | -0.388316327 |
| GPR126    | -0.3915      |
| HIST2H2BE | -0.392592593 |
| NFIL3     | -0.395357143 |
| KBTBD8    | -0.396923077 |
| TRIM14    | -0.397304688 |
| HRASLS2   | -0.401866667 |
| FAM129A   | -0.409477778 |
| IRF1      | -0.421714286 |
| BIRC3     | -0.424438776 |
| ANKS1B    | -0.430788889 |
| SYNJ1     | -0.431851852 |
| SLC15A3   | -0.436319613 |
| BLMH      | -0.439285714 |
| TRIM25    | -0.441025641 |
| ACSL4     | -0.441666667 |
| NFS1      | -0.442214286 |
| PSMB8     | -0.442214286 |
| IFIT1     | -0.4525      |
| GBP4      | -0.453085938 |
| IRF8      | -0.455       |
| GPR126    | -0.456666667 |
| WIPF1     | -0.459785714 |
| B2M       | -0.460561224 |

|          |              |
|----------|--------------|
| APOD     | -0.461       |
| APOL1    | -0.462       |
| PEL11    | -0.462755556 |
| IRF7     | -0.468571429 |
| CASP12   | -0.471111111 |
| TRIM34   | -0.474818402 |
| HTR1D    | -0.474818402 |
| TRIM22   | -0.480925926 |
| IFIT2    | -0.483305556 |
| CXCR4    | -0.487651332 |
| CEACAM1  | -0.490740741 |
| FTL      | -0.496683673 |
| LPGAT1   | -0.496683673 |
| IRF7     | -0.499288889 |
| TCIRG1   | -0.499296875 |
| NPC2     | -0.51037037  |
| ACRC     | -0.51037037  |
| GMPR     | -0.512988889 |
| ICAM1    | -0.51375     |
| IFI16    | -0.514744898 |
| BTC      | -0.51975     |
| PSMB9    | -0.520625    |
| CDKN1A   | -0.522883333 |
| MYD88    | -0.523       |
| CXCR4    | -0.526150121 |
| GPR177   | -0.5265      |
| MAFK     | -0.535928571 |
| NUB1     | -0.538105556 |
| TMEM140  | -0.539814815 |
| SLAMF7   | -0.544714286 |
| DDX58    | -0.550867347 |
| UBD      | -0.56464891  |
| IFIT2    | -0.564744444 |
| IL13RA1  | -0.564744444 |
| SOCS1    | -0.568928571 |
| SLC15A3  | -0.57748184  |
| ATP6V0A1 | -0.5775      |
| AKAP8    | -0.579205556 |
| IFRG15   | -0.58515625  |
| MOV10    | -0.59031477  |
| SLC15A3  | -0.59031477  |
| FCGR1A   | -0.5905      |
| GCH1     | -0.592       |
| GPR126   | -0.596020408 |
| LTF      | -0.596020408 |
| GBP4     | -0.596020408 |
| CCL5     | -0.6155      |
| TRIM6    | -0.618783333 |
| BIRC3    | -0.621827778 |

|              |              |
|--------------|--------------|
| OGFR         | -0.623112245 |
| FKBP1B       | -0.623112245 |
| CA13         | -0.623785714 |
| HERC6        | -0.628       |
| ZEB2         | -0.6285      |
| ATP6V0A1     | -0.629438889 |
| IL4I1        | -0.632136752 |
| CDKN1A       | -0.637811111 |
| IFI44L       | -0.646944444 |
| HCN3, PKLR   | -0.647214286 |
| BTC          | -0.658928571 |
| MOV10        | -0.667714286 |
| VISA         | -0.670642857 |
| CTTNBP2NL    | -0.672822222 |
| GCH1         | -0.677295918 |
| APOBEC1      | -0.67815     |
| PLSCR1       | -0.68        |
| APOL6        | -0.682357143 |
| AKT3         | -0.684       |
| CTSS         | -0.6845      |
| ASCC3        | -0.6855      |
| LOC728467    | -0.686326531 |
| PLA1A        | -0.686522222 |
| IRF1         | -0.687037037 |
| DAXX         | -0.6885      |
| PMP22        | -0.6895      |
| STAT2        | -0.693       |
| IFI44L       | -0.693       |
| APOL2        | -0.6945      |
| TRIM6        | -0.706666667 |
| ANKFY1       | -0.713418367 |
| TRIM34       | -0.718644068 |
| TRIM21       | -0.72034188  |
| AKAP8        | -0.722       |
| PSME2        | -0.7261      |
| HSD17B14     | -0.726285714 |
| SOCS1        | -0.728383333 |
| LOC100132247 | -0.729       |
| DDX24        | -0.737       |
| PSMB9        | -0.740510204 |
| IFIT1        | -0.7435      |
| TRIM25       | -0.744309927 |
| IRF1         | -0.744309927 |
| TMEM173      | -0.744366667 |
| GBP4         | -0.7465      |
| PARP14       | -0.747       |
| TRIM69       | -0.7485      |
| FAM129A      | -0.749540816 |
| TRIM25       | -0.74974359  |

|           |              |
|-----------|--------------|
| TRIM6     | -0.74974359  |
| STAT1     | -0.751       |
| IFI27L2   | -0.753       |
| CCDC50    | -0.758571429 |
| HERC6     | -0.776632653 |
| C2, CFB   | -0.776632653 |
| CDKN1A    | -0.776632653 |
| CEACAM1   | -0.779       |
| DDX24     | -0.780138889 |
| TRIM21    | -0.785663265 |
| STAT3     | -0.794       |
| RGS22     | -0.795       |
| ATL3      | -0.80372449  |
| SEMA6D    | -0.80372449  |
| AKAP8     | -0.821307506 |
| LOC652671 | -0.823247863 |
| KBTBD8    | -0.82775     |
| TRIM6     | -0.839846939 |
| CXCR4     | -0.839846939 |
| DHX58     | -0.848877551 |
| IFRD1     | -0.848877551 |
| GOSR1     | -0.858533333 |
| SAMD9     | -0.858533333 |
| WIPF1     | -0.875935714 |
| PARP14    | -0.878322222 |
| MSMB      | -0.886771429 |
| GBP1      | -0.888821429 |
| KBTBD8    | -0.896752137 |
| ZNFX1     | -0.90475     |
| ANKFY1    | -0.90475     |
| JAK2      | -0.912091837 |
| CXCL1     | -0.924       |
| AKAP8     | -0.99965812  |
| JAK2      | -1.029489796 |
| PNPT1     | -1.073166667 |
| CEACAM1   | -1.073166667 |
| TTC39B    | -1.073166667 |
| SNX5      | -1.073166667 |
| IL6       | -1.078       |
| AKAP8     | -1.087863248 |
| OAS2      | -1.09725     |
| XDH       | -1.17425     |
| LAP3      | -1.192040816 |
| ACSL4     | -1.1935      |
| TLR3      | -1.1935      |
| HSH2D     | -1.21275     |
| DDX3X     | -1.22017094  |
| MX1       | -1.264273504 |
| LGALS3BP  | -1.278974359 |



|              |              |
|--------------|--------------|
| TRIM21       | -1.293675214 |
| CHAC1        | -1.309       |
| PMP22        | -1.345561224 |
| STAT3        | -1.47008547  |
| IFI27        | -1.481055556 |
| GBP5         | -1.48225     |
| CYP26A1      | -1.67475     |
| NFS1         | -1.67475     |
| LOC727996    | -1.72        |
| ZNF384       | -1.98275     |
| NUB1         | -2.058119658 |
| PML          | -2.234529915 |
| PMP22        | -2.25225     |
| PARP9        | -2.31        |
| ACSL4        | -2.36775     |
| ANKS1B       | -2.375185185 |
| TRIM34       | -2.396239316 |
| PAK3         | -2.425641026 |
| CASP12       | -2.59875     |
| TRIM21       | -2.69025641  |
| IL4I1, NUP62 | -2.71965812  |
| PSMB10       | -2.772       |
| CXCR4        | -2.807863248 |
| APOL1        | -3.175384615 |
| KBTBD8       | -3.444410256 |
| UBD          | -3.495863248 |
| ANP32B       | -3.59975     |
| DDX3X        | -3.72225641  |
| PAK3         | -4.545504274 |
| PARP12       | -6.468       |
|              |              |
|              |              |
