# Supplementary material for: A new mechanism of interferon’s antiviral action: Induction of autophagy, essential for paramyxovirus replication, is inhibited by the interferon stimulated gene, TDRD7
Source: PubMed Central journal article supplement (PMC5806901; doi:10.1371/journal.ppat.1006877), 2018-01-30
Supplement: ppat.1006877.s009.pdf [file ppat.1006877.s009.pdf]

**Table S2: Evaluation of antiviral activity of TDRD7 in various human and mouse cell types**

| Cell line | Cell type                   | Tdrd7 expression                                                                    | Approach                     | Virus               | Used for                                     |
|-----------|-----------------------------|-------------------------------------------------------------------------------------|------------------------------|---------------------|----------------------------------------------|
| HeLa      | Human epithelial            | Yes, tested by qRT-PCR and IB, higher protein expression compared to ARPE19 (by IB) | KD                           | SeV<br>HPIV3<br>RSV | High throughput screen and virus replication |
| ARPE19    | Human retinal epithelial    | Yes, tested by IB, low protein expression compared to HeLa (by IB)                  | KD                           | SeV                 | Virus replication and autophagy mechanism    |
| HT1080    | Human fibroblasts           | Yes, tested by IB                                                                   | KO                           | SeV                 | Virus replication and autophagy mechanism    |
| HEK293T   | Human epithelial            | Not tested                                                                          | Ectopic                      | SeV                 | Virus replication and autophagy mechanism    |
| L929      | Mouse fibroblasts           | Yes, tested by qRT-PCR and IB, higher protein expression compared to LA4 (by IB)    | KD (shRNA#1) and ectopic     | SeV<br>EMCV         | Virus replication and autophagy mechanism    |
| LA4       | Mouse lung epithelial       | Yes, tested by qRT-PCR and IB, low protein expression compared L929 (by IB)         | KD (shRNA#1, #2) and ectopic | SeV                 | Virus replication                            |
| RAW264.7  | Mouse macrophage            | Yes, tested by qRT-PCR                                                              | KD (shRNA#1)                 | SeV                 | Virus replication and autophagy mechanism    |
| MEF       | Mouse embryonic fibroblasts | Yes, tested by qRT-PCR                                                              | KD (shRNA#1)                 | SeV                 | Virus replication                            |
